# Supplementary material
Source: MDPI journal article supplement (https://www.mdpi.com/2073-4344/13/10/1329)
Supplement: s1 [file s1]

# Selective Hydrodeoxygenation of Fatty Acids to Dodecane: The Role of Molybdenum

*Jiangtao Li<sup>1</sup>, Depeng Han<sup>1</sup>, Shuqian Xia<sup>1,\*</sup>*

<sup>1</sup>:Key Laboratory for Green Chemical Technology of State Education Ministry, School of Chemical Engineering and Technology, Tianjin University, Tianjin 300350, China

\* Correspondence: [shuqianxia@tju.edu.cn](mailto:shuqianxia@tju.edu.cn)

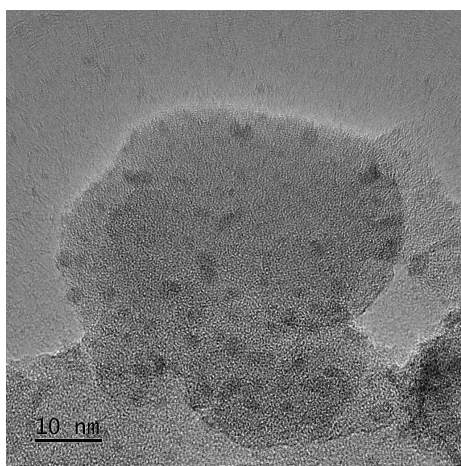

Figure S1 TEM image of Mo/SiO<sub>2</sub>.

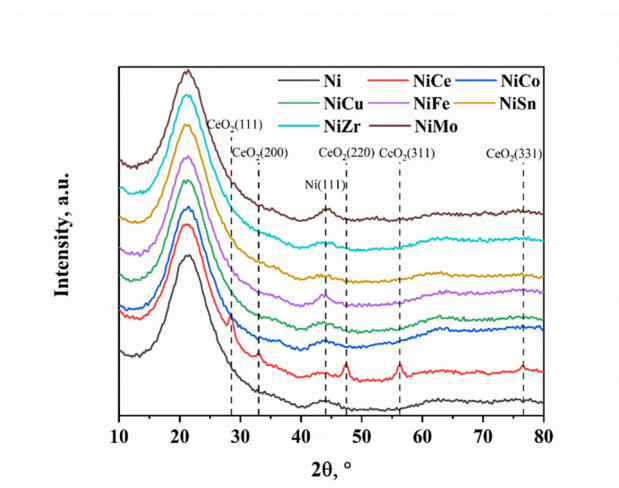

Figure S2 XRD patterns of Ni<sub>5</sub>M<sub>1</sub>/SiO<sub>2</sub>

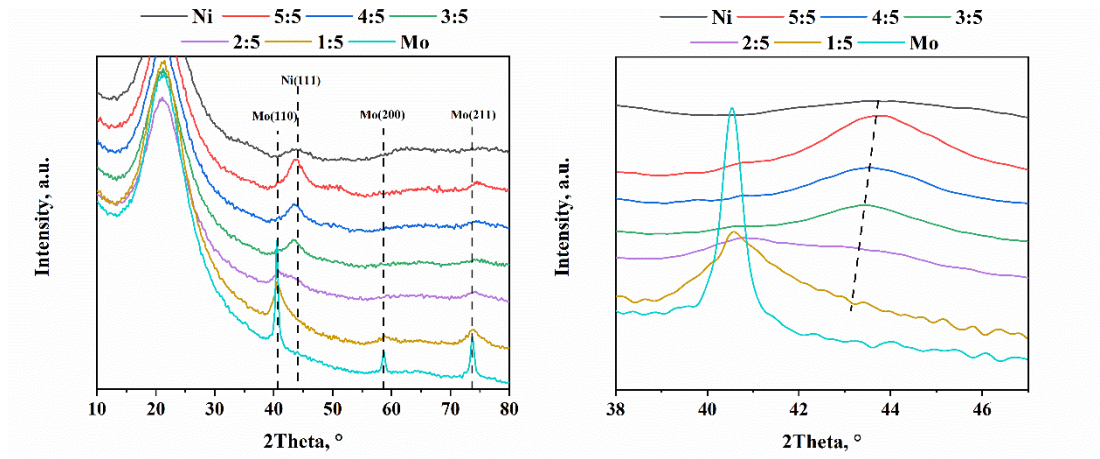

Figure S3 XRD patterns of Ni/SiO<sub>2</sub>, Mo/SiO<sub>2</sub> and Ni<sub>5</sub>Mo<sub>5</sub>/SiO<sub>2</sub>

Table S1 Accurate metal loading and Ni dispersity of Ni/SiO<sub>2</sub>, Mo/SiO<sub>2</sub>, and Ni<sub>5</sub>Mo<sub>x</sub>/SiO<sub>2</sub>.

|                                  | Metal loading, wt% <sup>a</sup> |       | Dispersity, % <sup>b</sup> |
|----------------------------------|---------------------------------|-------|----------------------------|
|                                  | Ni                              | Mo    |                            |
| Ni                               | 10.55                           | -     | 35.40                      |
| Ni <sub>5</sub> Mo <sub>1</sub>  | 9.88                            | 1.45  | 36.05                      |
| Ni <sub>5</sub> Mo <sub>3</sub>  | 10.65                           | 5.2   | 17.89                      |
| Ni <sub>5</sub> Mo <sub>5</sub>  | 10.47                           | 8.7   | 17.85                      |
| Ni <sub>5</sub> Mo <sub>7</sub>  | 9.28                            | 10.24 | 10.25                      |
| Ni <sub>5</sub> Mo <sub>10</sub> | 9.66                            | 16.23 | 9.80                       |
| Mo                               |                                 | 10.12 | 0.19                       |

<sup>a</sup>, Metal loading amount was determined by ICP-OES.

<sup>b</sup>, Dispersity of Ni was calculated based on the N<sub>2</sub>O-titration results.

Table S2 Chemical state of Ni by XPS <sup>a</sup>, %

| Catalysts                       | Ni <sup>0</sup> | Ni <sup>2+</sup> |
|---------------------------------|-----------------|------------------|
| Ni                              | 9.55            | 90.45            |
| Ni <sub>5</sub> Mo <sub>1</sub> | 19.44           | 80.56            |
| Ni <sub>5</sub> Mo <sub>3</sub> | 16.61           | 83.39            |
| Ni <sub>5</sub> Mo <sub>5</sub> | 17.53           | 82.47            |
| Ni <sub>5</sub> Mo <sub>7</sub> | 12.57           | 87.43            |

<sup>a</sup>, calculated by the peak area of XPSTable S3 Chemical state of Mo by XPS <sup>a</sup>, %

| Catalysts                       | Mo <sup>0</sup> | Mo <sup>3+</sup> | Mo <sup>4+</sup> | Mo <sup>5+</sup> | Mo <sup>6+</sup> |
|---------------------------------|-----------------|------------------|------------------|------------------|------------------|
| Ni <sub>5</sub> Mo <sub>1</sub> | 0.00            | 16.81            | 17.92            | 24.85            | 40.42            |
| Ni <sub>5</sub> Mo <sub>3</sub> | 4.72            | 10.57            | 27.62            | 17.42            | 39.67            |
| Ni <sub>5</sub> Mo <sub>5</sub> | 5.52            | 16.32            | 25.49            | 19.89            | 32.79            |
| Ni <sub>5</sub> Mo <sub>7</sub> | 8.15            | 16.15            | 25.10            | 25.58            | 25.02            |
| Mo                              | 7.54            | 19.91            | 28.21            | 25.72            | 18.62            |

<sup>a</sup>, calculated by the peak area of XPS

Table S4 Effect of Mo content on the conversion of lauric acid and product selectivity

|                                     | Conversion of lauric acid, % | Product selectivity, % |          |          |                |
|-------------------------------------|------------------------------|------------------------|----------|----------|----------------|
|                                     |                              | Lauryl alcohol         | Undecane | Dodecane | Lauryl laurate |
| Ni                                  | 9.73                         | 28.48                  | 7.92     | 2.14     | 65.30          |
| Ni <sub>5</sub> Mo <sub>1</sub>     | 94.27                        | 47.60                  | 30.92    | 7.94     | 11.43          |
| Ni <sub>5</sub> Mo <sub>3</sub>     | 98.36                        | 57.71                  | 20.10    | 10.76    | 10.17          |
| Ni <sub>5</sub> Mo <sub>5</sub>     | 92.47                        | 64.55                  | 11.94    | 9.08     | 13.17          |
| Ni <sub>5</sub> Mo <sub>7</sub>     | 81.68                        | 65.47                  | 7.11     | 6.63     | 18.45          |
| Ni <sub>5</sub> Mo <sub>10</sub>    | 53.67                        | 56.65                  | 12.71    | 5.35     | 27.46          |
| Ni <sub>5</sub> Mo <sub>3</sub> mix | 52.57                        | 49.29                  | 14.06    | 3.15     | 31.41          |
